# Supplementary material
Source: publisher figshare collection journal article supplement (https://asha.figshare.com/articles/dataset/_/15145185)
Supplement: Supplementary file 1 [file 1]

### Supplemental Material S8

*Regression model results predicting verbal SSRT*

| Task     | Predictor variables | <i>F</i> | <i>p</i> | <i>R</i> <sup>2</sup> |
|----------|---------------------|----------|----------|-----------------------|
| 2-Letter | SSI-4 Scores        | .587     | .679     | .176                  |
| 2-Image  | SSI-4 Scores        | 4.859    | .057     | .660                  |
| 12-Image | SSI-4 Scores        | 1.961    | .510     | .416                  |
| 2-Letter | OASES Scores        | 2.211    | .420     | .356                  |
| 2-Image  | OASES Scores        | 2.372    | .378     | .393                  |
| 12-Image | OASES Scores        | 4.306    | .084     | .518                  |

*Note.* *p*-values reflect Bonferroni correction.
