# Supplementary material
Source: publisher figshare collection journal article supplement (https://asha.figshare.com/articles/dataset/_/15145185)
Supplement: Supplementary file 2 [file 1]

## Supplemental Material S4

### *Description of dependent variables*

| Variable                           | Description                                                                                                                        |
|------------------------------------|------------------------------------------------------------------------------------------------------------------------------------|
| SSRT                               | Inhibition latency                                                                                                                 |
| SSD                                | Stop-signal delay before presentation of stop-signal (i.e., longer for more accurate stopping; shorter for less accurate stopping) |
| Go-response time                   | Average response time on a go-trial                                                                                                |
| Failed stop-response time          | Average response time on a stop-trial (i.e., failed stop)                                                                          |
| Probability of accurately stopping | Probability of accurately stopping during a stop-trial                                                                             |
| Accuracy                           | Go-response accuracy (i.e., correct button-press; correct letter/image naming)                                                     |
