# Supplementary material
Source: publisher figshare collection journal article supplement (https://asha.figshare.com/articles/dataset/_/15145185)
Supplement: Supplementary file 3 [file 1]

## Supplemental Material S1

### *Detailed SSI-4 and OASES data for AWS participants*

| Number | Severity <sup>a</sup> | SSI-4<br>% SS <sup>b</sup> | SSI-4<br>Duration | SSI-4<br>Physical<br>Concomitants | SSI-4<br>Total | OASES<br>Section 1 <sup>c</sup> | OASES<br>Section 2 <sup>d</sup> | OASES<br>Section 3 <sup>e</sup> | OASES<br>Section 4 <sup>f</sup> | OASES<br>Total |
|--------|-----------------------|----------------------------|-------------------|-----------------------------------|----------------|---------------------------------|---------------------------------|---------------------------------|---------------------------------|----------------|
| AWS-1  | None                  | 2                          | 2                 | 2                                 | 6              | 2.5                             | 1.53                            | 1.21                            | 1.32                            | 1.60           |
| AWS-2  | Mild                  | 10                         | 4                 | 6                                 | 20             | 2.15                            | 2.23                            | 2.78                            | 1.8                             | 2.23           |
| AWS-3  | VS                    | 16                         | 12                | 15                                | 43             | 3                               | 3.07                            | 3.24                            | 1.8                             | 2.78           |
| AWS-4  | Mild                  | 10                         | 6                 | 5                                 | 21             | 2.75                            | 3.33                            | 2.70                            | 1.56                            | 2.61           |
| AWS-5  | Mild                  | 9                          | 4                 | 5                                 | 18             | 3.12                            | 3.41                            | 3.63                            | 3.28                            | 3.38           |
| AWS-6  | Mild                  | 11                         | 2                 | 7                                 | 20             | 2.8                             | 2.60                            | 2.8                             | 1.96                            | 2.53           |
| AWS-7  | Mod                   | 13                         | 8                 | 7                                 | 28             | 2.00                            | 1.90                            | 2.45                            | 1.08                            | 1.82           |
| AWS-8  | VM                    | 7                          | 2                 | 1                                 | 10             | 3.06                            | 2.10                            | 2.35                            | 1.24                            | 2.11           |
| AWS-9  | Mod                   | 16                         | 6                 | 3                                 | 25             | 2.50                            | 2.60                            | 2.52                            | 2.32                            | 2.49           |
| AWS-10 | VM                    | 9                          | 2                 | 1                                 | 12             | 3.05                            | 2.13                            | 2                               | 1.36                            | 2.09           |
| AWS-11 | VM                    | 9                          | 2                 | 1                                 | 12             | 2.35                            | 2.70                            | 1.48                            | 1.8                             | 2.11           |
| AWS-12 | Mild                  | 16                         | 4                 | 4                                 | 24             | 2.45                            | 2.20                            | 2.83                            | 2.24                            | 2.41           |
| AWS-13 | VM                    | 9                          | 2                 | 0                                 | 11             | 3.31                            | 2.63                            | 2.92                            | 1.88                            | 2.63           |
| AWS-14 | VM                    | 9                          | 4                 | 4                                 | 17             | 3.18                            | 3.07                            | 2.83                            | 2.16                            | 2.79           |
| AWS-15 | VS                    | 16                         | 18                | 8                                 | 42             | 3.44                            | 3.27                            | 3.6                             | 2.12                            | 3.08           |
| AWS-16 | VM                    | 13                         | 2                 | 2                                 | 17             | 2.55                            | 3.03                            | 2.88                            | 2.08                            | 2.66           |
| AWS-17 | Mild                  | 12                         | 6                 | 4                                 | 22             | 2.95                            | 3.53                            | 3.36                            | 3.04                            | 3.25           |

<sup>a</sup>Severity: SSI-4 severity category; None: no stuttering category, VM: very mild, Mod: Moderate, VS: very severe.

<sup>b</sup>Percentage SS: percentage of stuttered syllables score

<sup>c</sup>OASES Section 1: *General Information*

<sup>d</sup>OASES Section 2: *Your Reactions to Stuttering*

<sup>e</sup>OASES Section 3: *Communication in Daily Situations*

<sup>f</sup>OASES Section 4: *Quality of Life*.
