# Supplementary material
Source: publisher figshare collection journal article supplement (https://asha.figshare.com/articles/dataset/_/15145185)
Supplement: Supplementary file 4 [file 1]

### Supplemental Material S3

*Properties of stimuli chosen for novel, image-naming verbal stop-signal tasks*

| Task     | Stimulus | Word Frequency      | Phonotactic Probability | Neighborhood Density | Neighborhood Frequency | Response Time (ms) |
|----------|----------|---------------------|-------------------------|----------------------|------------------------|--------------------|
| 2-image  | Bucket   | 10.02               | 0.07                    | 4                    | 4.27                   | 892                |
| 2-image  | Castle   | 21.55               | 0.10                    | 12                   | 6.88                   | 893                |
| 12-image | Bottle   | 50.75               | 0.10                    | 9                    | 7.03                   | 990                |
| 12-image | Camel    | 5.02                | 0.10                    | 9                    | 11.53                  | 892                |
| 12-image | Diaper   | 4.27                | 0.09                    | 13                   | 5.52                   | 1248               |
| 12-image | Feather  | 6.63                | 0.09                    | 12                   | 62.31                  | 977                |
| 12-image | Jacket   | 33.41               | 0.08                    | 5                    | 6.70                   | 924                |
| 12-image | Ladder   | 9.25                | 0.08                    | 14                   | 5.41                   | 988                |
| 12-image | Music    | 151.65 <sup>a</sup> | 0.06                    | 2                    | 7.60                   | 1056               |
| 12-image | Parrot   | 3.27                | 0.09                    | 5                    | 2.65                   | 1045               |
| 12-image | Pirate   | 7.35                | 0.09                    | 3                    | 12.22                  | 1186               |
| 12-image | Rocket   | 11.84               | 0.09                    | 7                    | 7.79                   | 861                |
| 12-image | Shovel   | 5.84                | 0.08                    | 6                    | 4.55                   | 858                |
| 12-image | Towel    | 14.16               | 0.08                    | 25                   | 91.56                  | 973                |

<sup>a</sup>z-score: 3.27
