# Supplementary material
Source: publisher figshare collection journal article supplement (https://asha.figshare.com/articles/dataset/_/15145185)
Supplement: Supplementary file 5 [file 1]

## Supplemental Material S7

### *Average stop-signal task data*

| Variable | Go-trial accuracy |       | Go-trial RT <sup>a</sup> |        | Probability <sup>b</sup> |       | SSD <sup>c</sup> |        | SSRT <sup>d</sup> |         | Failed-stop RT <sup>e</sup> |        |
|----------|-------------------|-------|--------------------------|--------|--------------------------|-------|------------------|--------|-------------------|---------|-----------------------------|--------|
|          | AWS               | AWNS  | AWS                      | AWNS   | AWS                      | AWNS  | AWS              | AWNS   | AWS               | AWNS    | AWS                         | AWNS   |
| Manual   | 98.9              | 99.6  | 652.7                    | 707.7  | .559                     | .566  | 458.9            | 520.2  | 204.5             | 211.9   | 597.3                       | 662.8  |
|          | [.39]             | [.24] | [59.9]                   | [50.3] | [.02]                    | [.02] | [63.9]           | [57.2] | [15.5]            | [10.15] | [56.56]                     | [50.3] |
| 2-Letter | 99.8              | 99.5  | 639.7                    | 647.0  | .555                     | .560  | 343.5            | 348.8  | 298.3             | 299.1   | 568.8                       | 576.5  |
|          | [.14]             | [.38] | [29.2]                   | [25.6] | [.01]                    | [.01] | [32.8]           | [29.8] | [14.3]            | [12.7]  | [24.24]                     | [23.2] |
| 2-Image  | 98.4              | 98.8  | 657.4                    | 618.8  | .530                     | .533  | 365.9            | 322.2  | 279.5             | 295.7   | 611.6                       | 569.8  |
|          | [.43]             | [.31] | [30.1]                   | [20.8] | [.02]                    | [.02] | [39.5]           | [27.1] | [13.4]            | [12.8]  | [28.0]                      | [21.4] |
| 12-Image | 98.6              | 99.4  | 691.4                    | 674.9  | .559                     | .547  | 378.6            | 372.0  | 315.4             | 300.2   | 654.9                       | 636.9  |
|          | [.32]             | [.19] | [22.7]                   | [13.5] | [.02]                    | [.03] | [36.7]           | [22.5] | [23.3]            | [18.5]  | [22.8]                      | [11.9] |

*Note.* Data from the four stop-signal tasks. All data reported are averages taken from included participants. Go-trial accuracy represents percentage of accurate responses. [Standard Error]

<sup>a</sup>Go-trial response time (ms)

<sup>b</sup>Probability of stopping on a stop-trial

<sup>c</sup>Stop-signal delay (ms)

<sup>d</sup>Stop-signal reaction time (ms)

<sup>e</sup>Response time on failed-stop trials (ms)
