# Supplementary material
Source: publisher figshare collection journal article supplement (https://asha.figshare.com/articles/dataset/_/15145185)
Supplement: Supplementary file 6 [file 1]

## Supplemental Material S6

### *Overall verbal stop-signal task data*

|      | Go-trial<br>accuracy | Go-trial<br>response time<br>(ms) | Probability of<br>stopping on a<br>stop-trial | Stop-signal<br>delay (ms) | Stop-signal<br>reaction time<br>(ms) | RT of responses<br>on failed stop-<br>trials (ms) |
|------|----------------------|-----------------------------------|-----------------------------------------------|---------------------------|--------------------------------------|---------------------------------------------------|
| AWS  | 98.98                | 662.80                            | .548                                          | 362.65                    | 299.06                               | 614.00                                            |
| AWNS | 99.44                | 646.88                            | .547                                          | 347.67                    | 302.64                               | 594.41                                            |

*Note.* Data are averaged from the three stop-signal tasks, giving overall verbal outcomes. All data reported are averages taken from included participants. Go-trial accuracy represents percentage of accurate responses.
