# Supplementary material
Source: publisher figshare collection journal article supplement (https://asha.figshare.com/articles/dataset/_/15145185)
Supplement: Supplementary file 7 [file 1]

## Supplemental Material S5

### *Excluded SSRT values*

|               | Removed SSRT Values |      |       |
|---------------|---------------------|------|-------|
|               | AWS                 | AWNS | Total |
| Manual task   | 2                   | 4    | 6     |
| 2-letter task | 1                   | 1    | 2     |
| 2-image task  | 2                   | 2    | 4     |
| 12-image task | 1                   | 1    | 2     |
